# Supplementary material
Source: PubMed Central journal article supplement (PMC5637578)
Supplement: tpmd160260.SD1.pdf [file tpmd160260.SD1.pdf]

SUPPLEMENTAL TABLE 1  
Malaria case numbers imported from other regions or countries in Guangxi, 2010–2015\*

| Country of origin            | Total        | <i>P. falciparum</i> | <i>P. vivax</i> | <i>P. malariae</i> | <i>P. ovale</i> | Mixed infection | Unclassified |
|------------------------------|--------------|----------------------|-----------------|--------------------|-----------------|-----------------|--------------|
| Africa                       | 1,881        | 1,576                | 123             | 22                 | 118             | 28              | 14           |
| Ghana                        | 1,534        | 1,330                | 93              | 12                 | 74              | 17              | 8            |
| Cameroon                     | 132          | 95                   | 2               | 1                  | 30              | 4               | 0            |
| Angola                       | 61           | 45                   | 7               | 4                  | 4               | 0               | 1            |
| Equatorial Guinea            | 27           | 23                   | 3               | 0                  | 0               | 0               | 1            |
| Nigeria                      | 17           | 14                   | 1               | 0                  | 1               | 1               | 0            |
| Sierra Leone                 | 17           | 13                   | 2               | 1                  | 1               | 0               | 0            |
| Côte d' Ivoire               | 15           | 11                   | 0               | 0                  | 4               | 0               | 0            |
| Congo (Kinshasa)             | 14           | 4                    | 6               | 2                  | 1               | 1               | 0            |
| Guinea                       | 11           | 8                    | 1               | 1                  | 0               | 1               | 0            |
| Gabon                        | 10           | 5                    | 1               | 0                  | 2               | 0               | 2            |
| Mozambique                   | 8            | 6                    | 1               | 0                  | 0               | 0               | 1            |
| Congo                        | 8            | 4                    | 1               | 0                  | 1               | 2               | 0            |
| Liberia                      | 6            | 3                    | 2               | 0                  | 0               | 1               | 0            |
| Madagascar                   | 4            | 3                    | 0               | 0                  | 0               | 0               | 1            |
| Togo                         | 3            | 3                    | 0               | 0                  | 0               | 0               | 0            |
| The Central African Republic | 2            | 1                    | 1               | 0                  | 0               | 0               | 0            |
| Comoros                      | 1            | 1                    | 0               | 0                  | 0               | 0               | 0            |
| Tanzania                     | 1            | 1                    | 0               | 0                  | 0               | 0               | 0            |
| South Africa                 | 1            | 1                    | 0               | 0                  | 0               | 0               | 0            |
| Zimbabwe                     | 1            | 1                    | 0               | 0                  | 0               | 0               | 0            |
| Congo (Brazzaville)          | 1            | 0                    | 0               | 1                  | 0               | 0               | 0            |
| Zambia                       | 1            | 1                    | 0               | 0                  | 0               | 0               | 0            |
| Chad                         | 1            | 0                    | 0               | 0                  | 0               | 1               | 0            |
| Sudan                        | 1            | 1                    | 0               | 0                  | 0               | 0               | 0            |
| Benin                        | 1            | 1                    | 0               | 0                  | 0               | 0               | 0            |
| Uganda                       | 1            | 0                    | 1               | 0                  | 0               | 0               | 0            |
| Mali                         | 1            | 1                    | 0               | 0                  | 0               | 0               | 0            |
| Unknown                      | 1            | 0                    | 1               | 0                  | 0               | 0               | 0            |
| Southeast Asia               | 176          | 44                   | 113             | 5                  | 4               | 8               | 2            |
| Myanmar                      | 104          | 34                   | 59              | 4                  | 3               | 4               | 0            |
| Indonesia                    | 35           | 6                    | 24              | 0                  | 1               | 4               | 0            |
| Cambodia                     | 27           | 1                    | 24              | 1                  | 0               | 0               | 1            |
| Laos                         | 5            | 1                    | 4               | 0                  | 0               | 0               | 0            |
| Vietnam                      | 3            | 1                    | 2               | 0                  | 0               | 0               | 0            |
| Thailand                     | 1            | 1                    | 0               | 0                  | 0               | 0               | 0            |
| Malaysia                     | 1            | 0                    | 0               | 0                  | 0               | 0               | 1            |
| Southern Asia                | 1            | 0                    | 1               | 0                  | 0               | 0               | 0            |
| Pakistan                     | 1            | 0                    | 1               | 0                  | 0               | 0               | 0            |
| Domestic†                    | 10           | 0                    | 9               | 0                  | 1               | 0               | 0            |
| Yunnan                       | 3            | 0                    | 3               | 0                  | 0               | 0               | 0            |
| Hainan                       | 3            | 0                    | 3               | 0                  | 0               | 0               | 0            |
| Anhui                        | 2            | 0                    | 2               | 0                  | 0               | 0               | 0            |
| Guangdong                    | 1            | 0                    | 1               | 0                  | 0               | 0               | 0            |
| Unknown                      | 1            | 0                    | 0               | 0                  | 1               | 0               | 0            |
| <b>Total</b>                 | <b>2,068</b> | <b>1,620</b>         | <b>246</b>      | <b>27</b>          | <b>123</b>      | <b>36</b>       | <b>16</b>    |

\* The imported source contains abroad countries and domestic within China.

† For Guangxi, these were imported cases but for China, these were all local-acquired transmission.
